# Supplementary material for: Four concurrent feedforward and feedback networks with different roles in the visual cortical hierarchy
Source: PubMed Central journal article supplement (PMC8865670; doi:10.1371/journal.pbio.3001534), 2022-02-10
Supplement: pbio.3001534.s001.pdf [file pbio.3001534.s001.pdf]

## Supplementary Information

### Four concurrent feedforward and feedback networks with different roles in the visual cortical hierarchy

Elham Barzegaran, Gijs Plomp

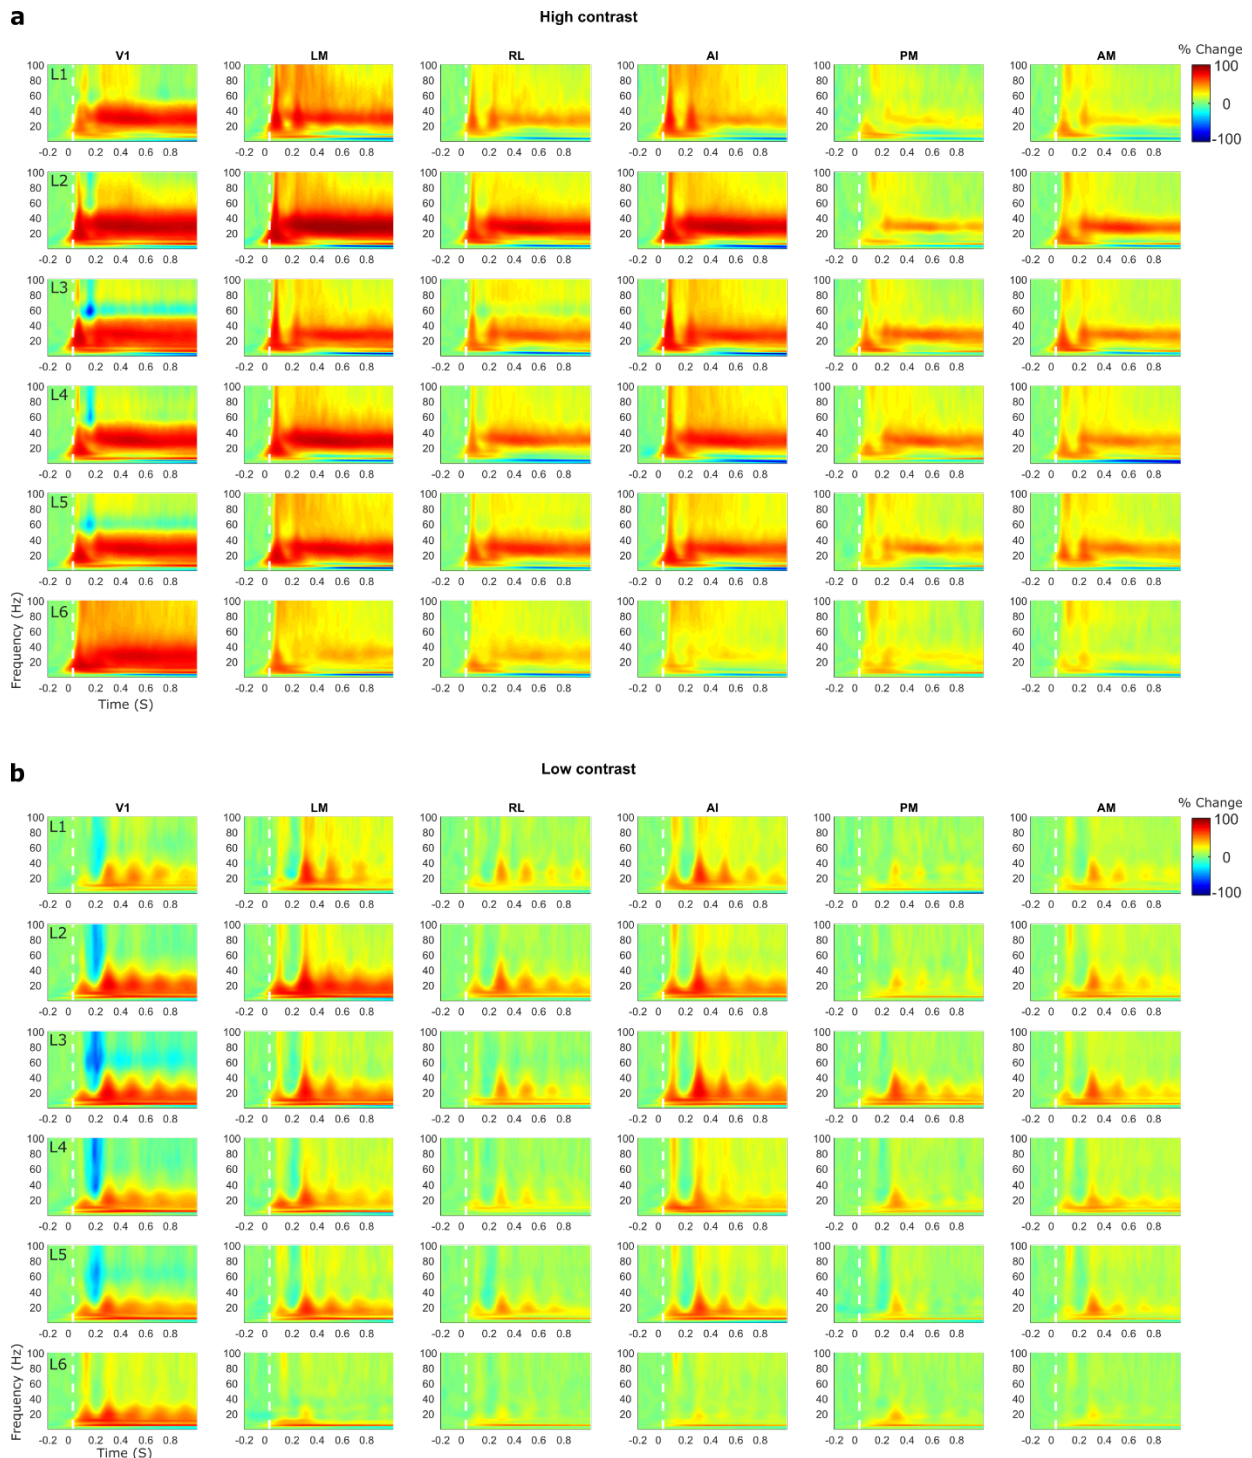

**S1 Fig. Laminar power spectral densities per area.** **a**, shows visually induced power spectral density (PSD; Morlet wavelet) with respect to pre-stimulus time, for high-contrast stimuli. **b**, shows corresponding data for low-contrast stimuli. Underlying data: <https://osf.io/pqf7z/>
