# Supplementary material for: Four concurrent feedforward and feedback networks with different roles in the visual cortical hierarchy
Source: PubMed Central journal article supplement (PMC8865670; doi:10.1371/journal.pbio.3001534), 2022-02-10
Supplement: pbio.3001534.s002.pdf [file pbio.3001534.s002.pdf]

## Supplementary Information

### Four concurrent feedforward and feedback networks with different roles in the visual cortical hierarchy

Elham Barzegaran, Gijs Plomp

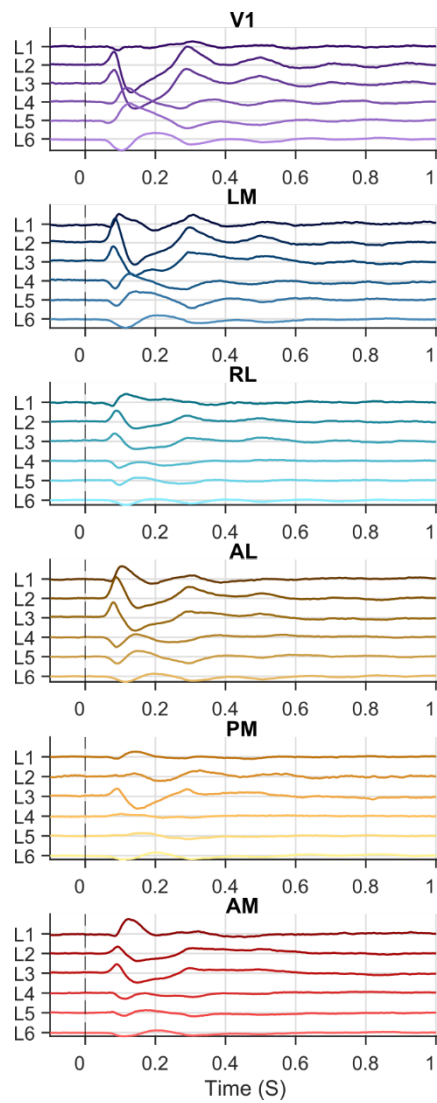

**S2 Fig. Grand-average bipolar LFPs for low contrast stimuli.** Data for L1 to L6 in six visual areas. Underlying

data: <https://osf.io/pqf7z/>
